# Supplementary material
Source: PubMed Central journal article supplement (PMC1838508)
Supplement: pnas_0701059104_4.pdf [file pnas_0701059104_4.pdf]

## Chromosome 2

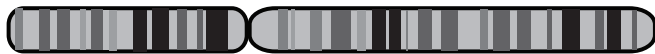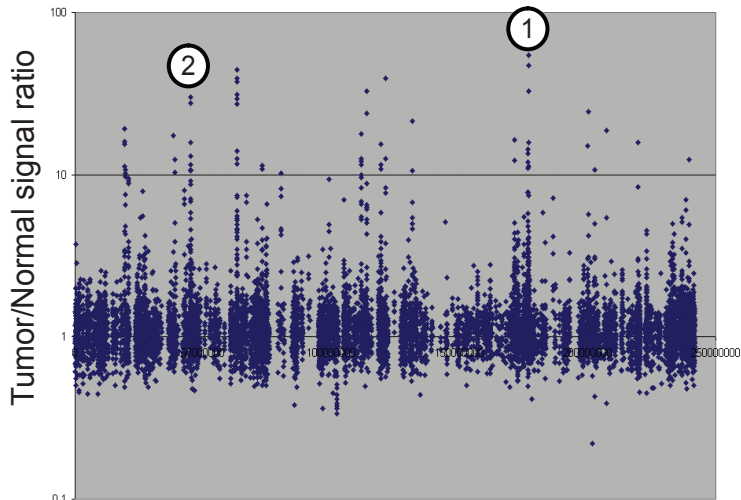

1 - HOXD Cluster 2 - SIX3/2

## Chromosome 7

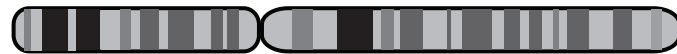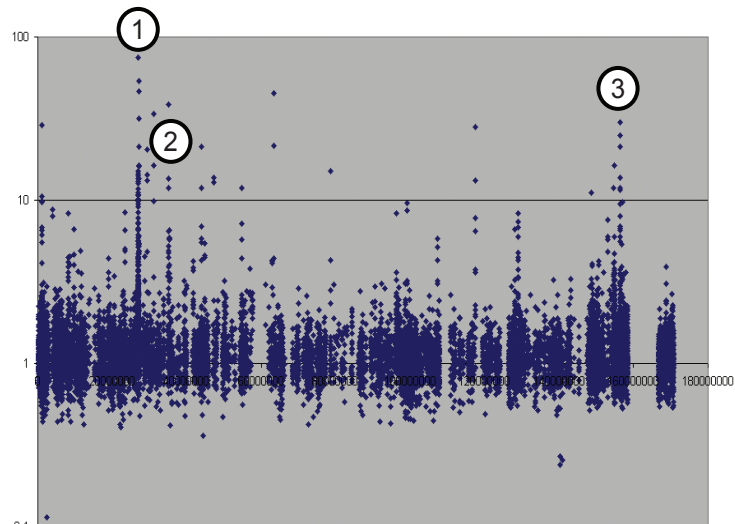

1 - HOXA Cluster 2 - TBX20 3 - EN2

## Chromosome 12

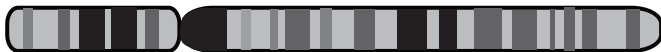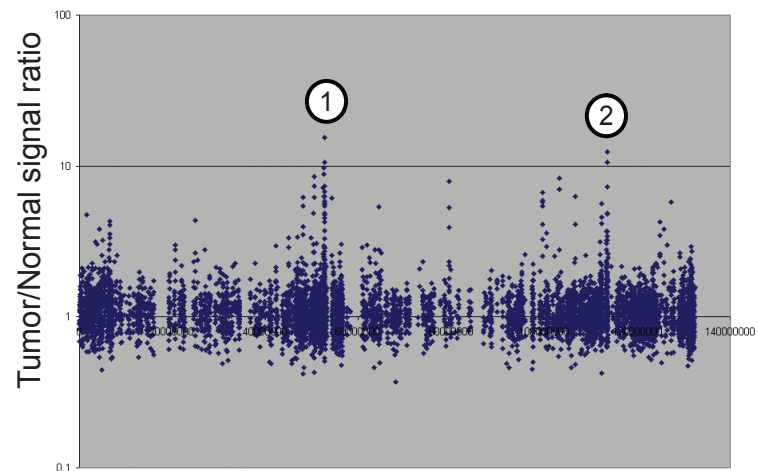

1 - HOXC Cluster 2 - TBX3

## Chromosome 17

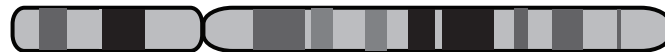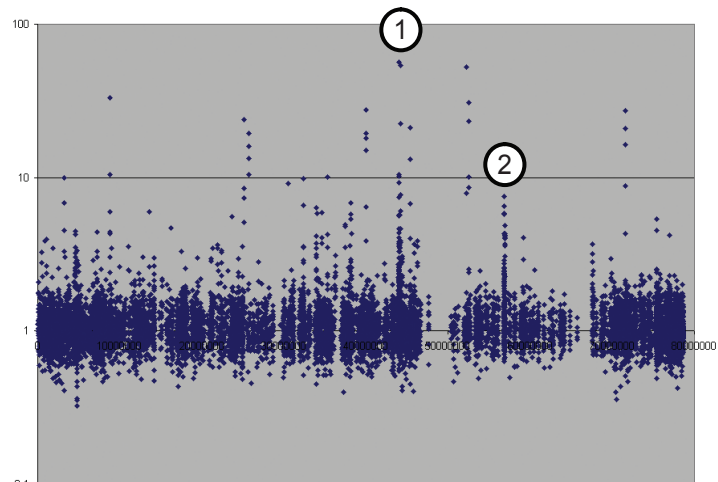

1 - HOXB Cluster 2 - TBX2
