# Supplementary material
Source: PubMed Central journal article supplement (PMC1838508)
Supplement: pnas_0701059104_7.pdf [file pnas_0701059104_7.pdf]

**Table 1: CpG islands in the *HOXA* cluster**

| <i>HOXA</i> CGIs | Genomic location       | No. CpG | Methylation in A549 cells <sup>1</sup> |
|------------------|------------------------|---------|----------------------------------------|
| 1                | chr7:27094026-27094893 | 77      | —                                      |
| 2                | chr7:27100623-27100828 | 17      | —                                      |
| 3                | chr7:27101868-27103261 | 116     | +                                      |
| 4                | chr7:27109707-27110004 | 24      | +                                      |
| 5                | chr7:27112595-27113125 | 49      | +                                      |
| 6                | chr7:27114115-27114914 | 67      | —                                      |
| 7                | chr7:27116556-27116943 | 45      | +                                      |
| 8                | chr7:27119713-27120172 | 46      | —                                      |
| 9                | chr7:27121525-27121951 | 33      | —                                      |
| 10               | chr7:27128613-27128951 | 24      | —                                      |
| 11               | chr7:27130345-27130623 | 32      | +                                      |
| 12               | chr7:27136098-27137163 | 87      | —                                      |
| 13               | chr7:27145588-27146036 | 37      | —                                      |
| 14               | chr7:27149139-27152087 | 207     | +                                      |
| 15               | chr7:27153453-27154217 | 63      | —                                      |
| 16               | chr7:27156800-27157640 | 72      | —                                      |
| 17               | chr7:27161109-27161352 | 28      | +                                      |
| 18               | chr7:27162127-27163092 | 91      | +                                      |
| 19               | chr7:27164708-27165039 | 28      | —                                      |
| 20               | chr7:27166187-27167485 | 94      | —                                      |
| 21               | chr7:27170441-27172987 | 201     | +                                      |
| 22               | chr7:27175397-27176141 | 53      | —                                      |
| 23               | chr7:27178942-27180921 | 183     | +                                      |
| 24               | chr7:27185835-27186275 | 36      | —                                      |
| 25               | chr7:27190793-27191121 | 33      | +                                      |
| 26               | chr7:27191576-27192154 | 41      | +                                      |
| 27               | chr7:27194046-27195568 | 97      | +                                      |
| 28               | chr7:27198331-27199622 | 114     | +                                      |
| 29               | chr7:27205216-27206836 | 113     | +                                      |
| 30               | chr7:27211056-27211822 | 69      | +                                      |
| 31               | chr7:27219207-27220360 | 84      | —                                      |
| 32               | chr7:27226627-27226992 | 37      | —                                      |
| 33               | chr7:27231684-27232018 | 40      | +                                      |
| 34               | chr7:27241581-27242151 | 54      | —                                      |
| 35               | chr7:27245471-27245994 | 51      | +                                      |
| 36               | chr7:27248612-27249661 | 81      | +                                      |
| 37               | chr7:27249934-27250139 | 17      | —                                      |
| 38               | chr7:27251165-27252762 | 132     | +                                      |
| 39               | chr7:27257645-27258722 | 89      | +                                      |

Note 1: Methylation status was determined from Agilent CpG island microarrays. A plus sign (+) indicates that the CpG island is hypermethylated in A549 compared with NHBE cells shown by multiple oligos with a hybridization signal ratio  $\geq 3.0$ ; A minus (-) sign indicates that the gene is either unmethylated or methylated to a similar level as the NHBE control.
